# Supplementary material for: Ganzheitlicher Entwurf verlustleistungsarmer Schaltungen für Sensorsignalverarbeitung und Erkennung.
Source: MDPI journal article supplement (doi:10.3390/life11090913), 2005-01-01
Supplement: s1 [file s1]

# Supplementary Materials

## Demographic and clinical characteristics

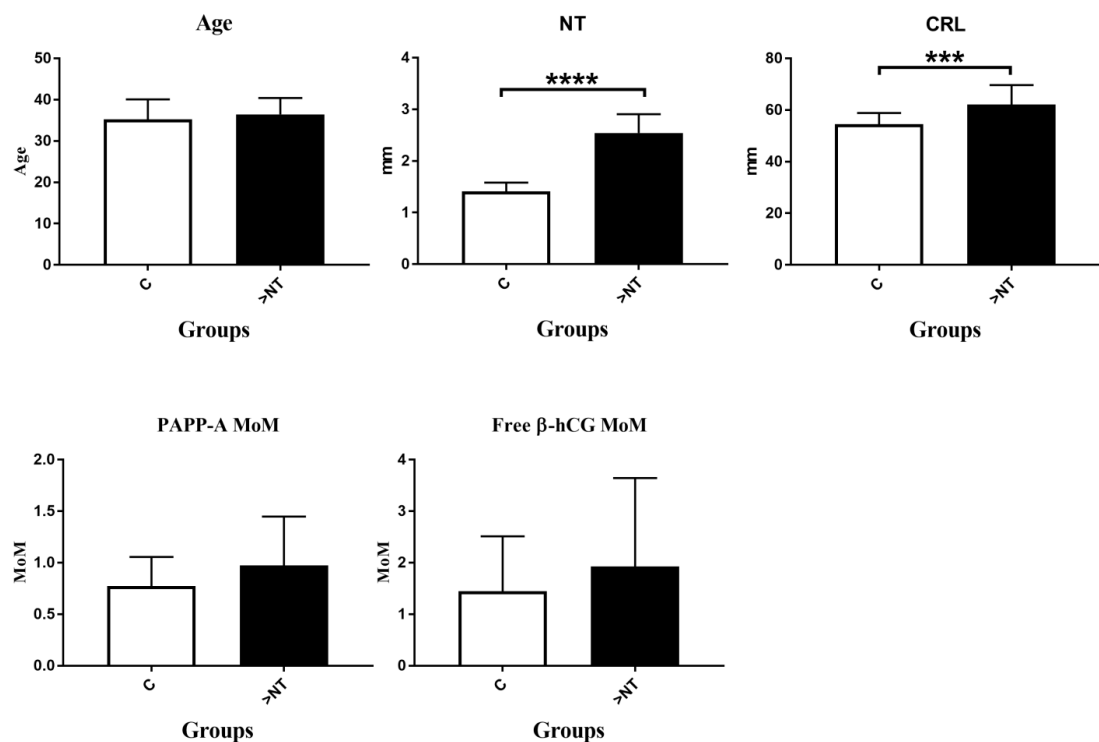

**Figure S1.** Graphical comparisons of the demographic and clinical characteristics of the control subjects and >NT fetuses. \*\*\* =  $p = 0.0001$ ; \*\*\*\* =  $p < 0.0001$  after Student's  $t$ -test.

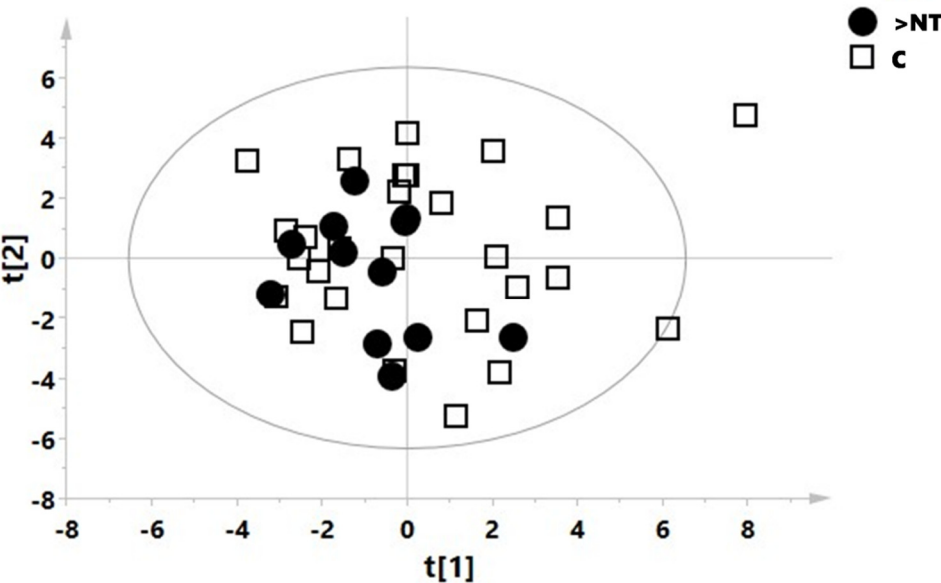

**Figure S2.** Unsupervised PCA model of the fetuses with enlarged nuchal translucency (black circles) and controls (white boxes).
